# Supplementary material for: Real-Time Ultrasound-Guided Spinal Anaesthesia: A Prospective Observational Study of a New Approach
Source: Hindawi journal article supplement (doi:10.1155/2013/525818), 2013-01-01
Supplement: f1 [file 525818.f1.zip]

Archive with 2 entries (2 files):
- Real-time_Spinal_needle_insertion_and_withdrawl_US_video_clip_ARP_419464.asf
- Short description.pdf
